# Supplementary material
Source: MDPI journal article supplement (https://www.mdpi.com/2073-4433/14/2/305)
Supplement: s1 [file s1]

Supplementary materials

# PM<sub>10</sub> Resuspension of Road Dust in Different Types of Parking Lots: Emissions, Chemical Characterisation and Ecotoxicity

Ismael Casotti Rienda <sup>1,\*</sup>, Célia A. Alves <sup>1,\*</sup>, Teresa Nunes <sup>1</sup>, Marlene Soares <sup>1</sup>, Fulvio Amato <sup>2</sup>, Ana Sánchez de la Campa <sup>3,4</sup>, Nóra Kováts <sup>5</sup>, Katalin Hubai <sup>5</sup> and Gábor Teke <sup>6</sup>

<sup>1</sup> Department of Environment and Planning, Centre for Environmental and Marine Studies, University of Aveiro, 3810-193 Aveiro, Portugal

<sup>2</sup> Institute of Environmental Assessment and Water Research, Spanish Research Council (IDAE-CSIC), 08034 Barcelona, Spain

<sup>3</sup> Associate Unit CSIC-University of Huelva “Atmospheric Pollution”, Centre for Research in Sustainable Chemistry-CIQSO, University of Huelva, 21071 Huelva, Spain

<sup>4</sup> Department of Earth Science, Faculty of Experimental Sciences, University of Huelva, Campus El Carmen s/n, 21071 Huelva, Spain

<sup>5</sup> Centre of Natural Environmental Sciences, University of Pannonia, Egyetem Str. 10, 8200 Veszprém, Hungary

<sup>6</sup> ELGOSCAR-2000 Environmental Technology and Water Management Ltd., 8184 Balatonfűzfő, Hungary

\* Correspondence: ismaelcrienda@ua.pt (I.C.R.); celia.alves@ua.pt (C.A.A.)

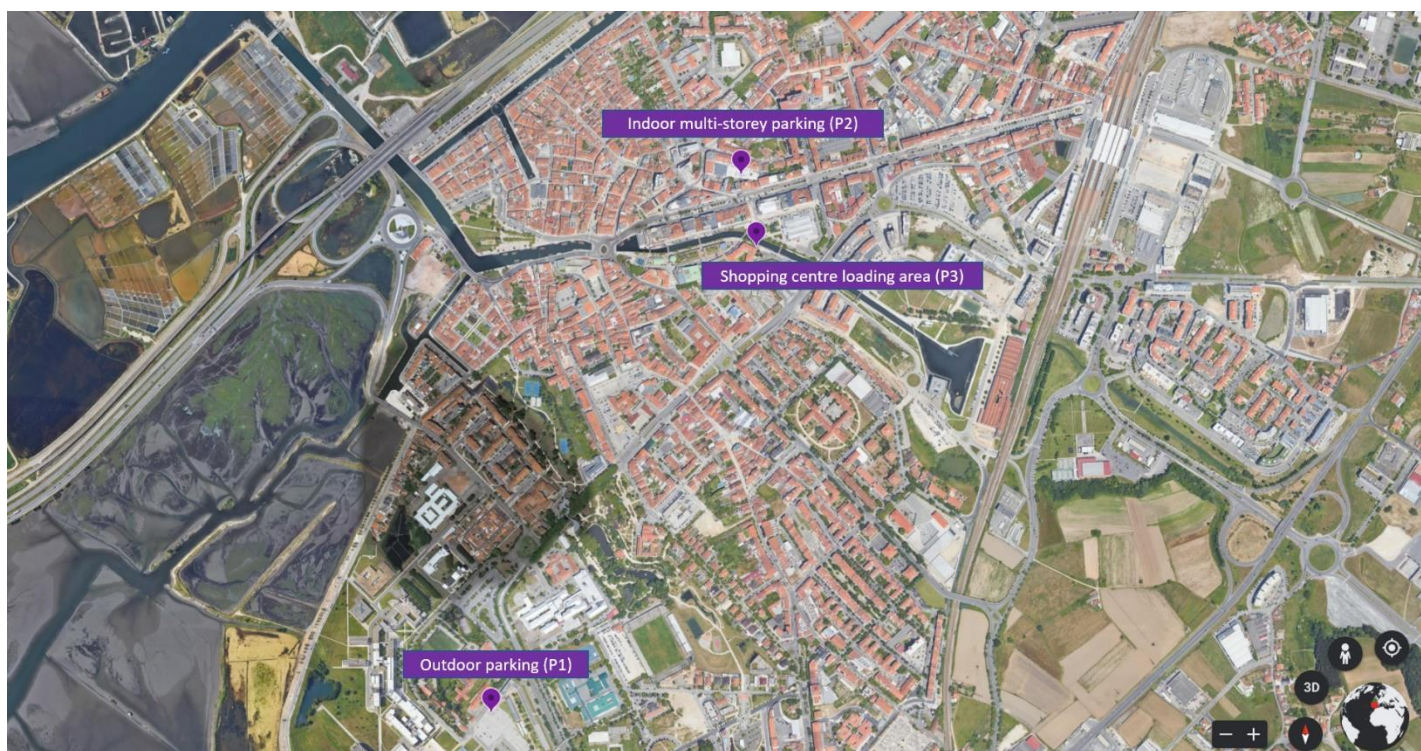

**Figure S1.** Map of Aveiro and indication of sampling sites. Source: Google Earth image.



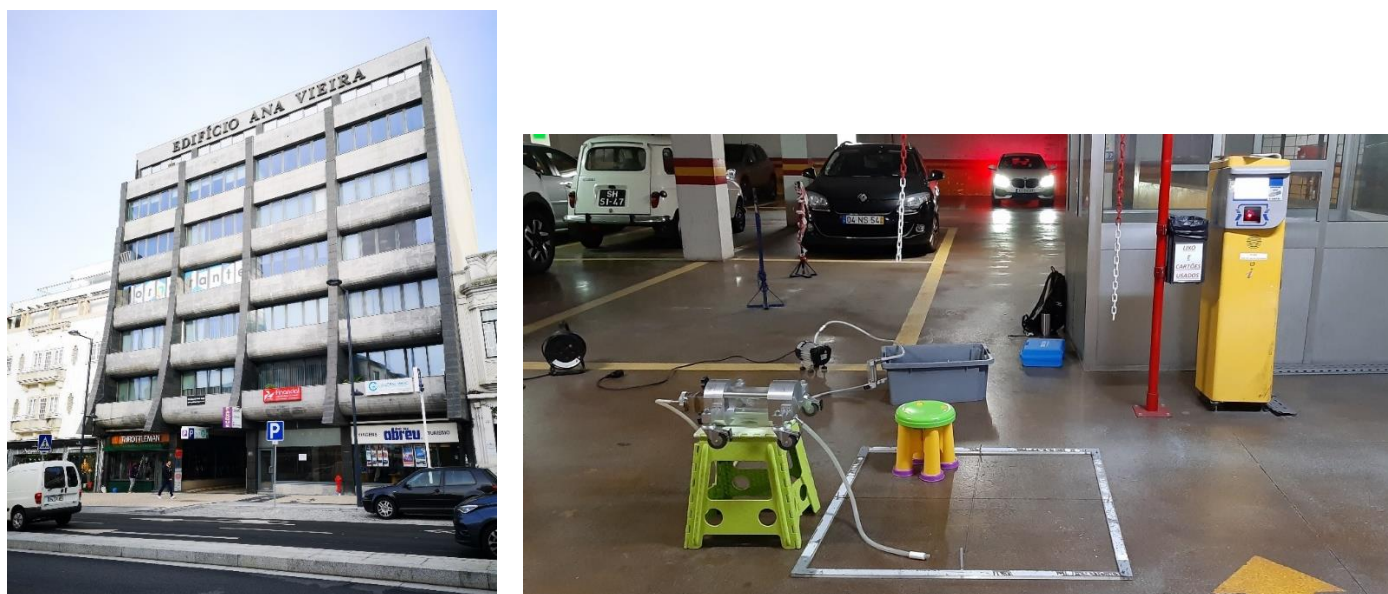

Figure S2. Multi-storey indoor parking. Source: our own pictures.

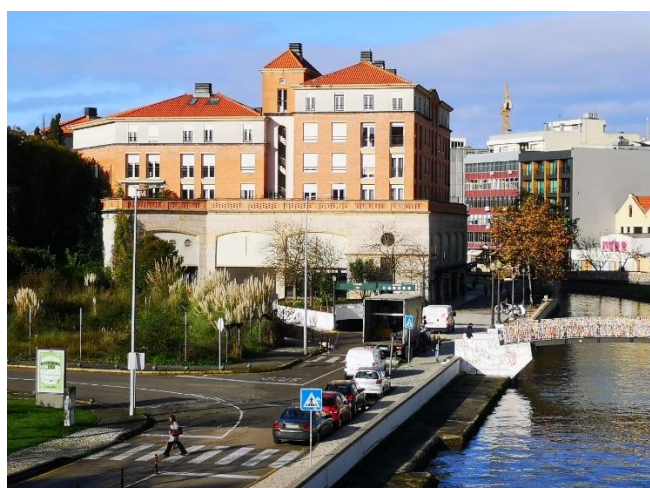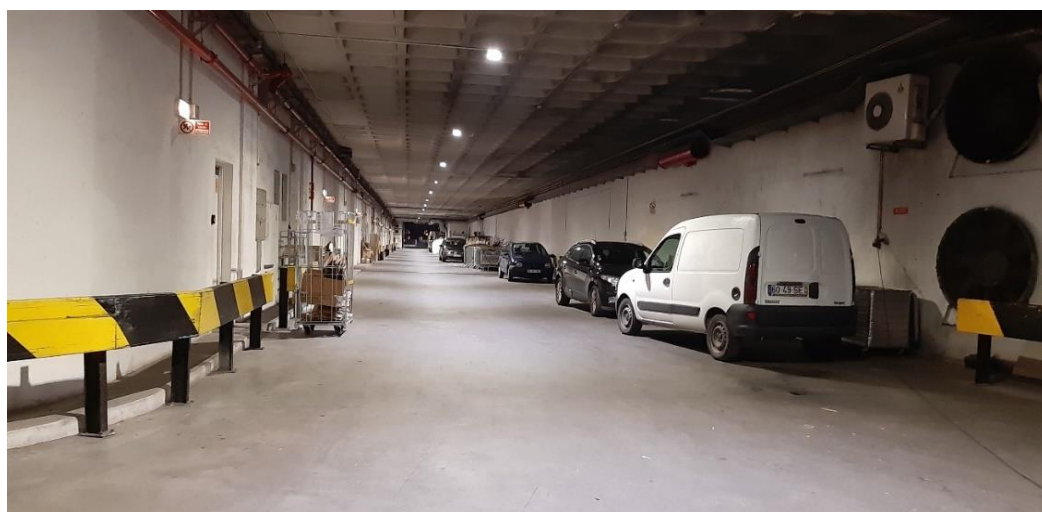

Figure S3. Shopping mall (FORUM Aveiro) and the entrance for loading trucks, vans and other vehicles. Source: our own pictures.

**Table S1.** Dust loadings and emission factors.

| Sampling location and characteristics |                                                             |                                                                                                                                                   | DL <sub>10</sub> (mg m <sup>-2</sup> ) |            | EF (g veh <sup>-1</sup> km <sup>-1</sup> ) |               |
|---------------------------------------|-------------------------------------------------------------|---------------------------------------------------------------------------------------------------------------------------------------------------|----------------------------------------|------------|--------------------------------------------|---------------|
| <b>Aveiro</b>                         | <b>Outdoor parking of university campus, Campus UA (P1)</b> | Area by the entrance, lane that gives access to parking lots                                                                                      | 8.9                                    |            | 269.3                                      |               |
|                                       |                                                             | Lane of parking lots                                                                                                                              | 17.9                                   | 18.5 ± 9.8 | 475.3                                      | 475.8 ± 206.8 |
|                                       |                                                             | Exit area, degraded pavement with loose sand                                                                                                      | 28.5                                   |            | 682.9                                      |               |
| <b>Aveiro</b>                         | <b>Indoor multi-storey parking, Parque Ana Vieira (P2)</b>  | Beginning of the ramp from level -1 to ground floor, smooth pavement with some big cracks                                                         | 25.7                                   |            | 634.3                                      |               |
|                                       |                                                             | 20 cm upper in the same ramp, left side of wheel track                                                                                            | 34                                     |            | 799.1                                      |               |
|                                       |                                                             | right side of wheel track                                                                                                                         | 23.9                                   | 23.7 ± 8.1 | 597.8                                      | 589 ± 166.1   |
|                                       |                                                             | close to the end of the ramp, upper side, right wheel track, rougher pavement                                                                     | 16                                     |            | 431.9                                      |               |
|                                       |                                                             | ground floor lane with smooth pavement, right wheel track                                                                                         | 29.8                                   |            | 710.6                                      |               |
|                                       |                                                             | by the exit, where the ticket is showed to check out                                                                                              | 12.7                                   |            | 360.5                                      |               |
|                                       |                                                             | by the exit, after cleaning                                                                                                                       | 1.8                                    | 1.8        | 75.2                                       | 75.2          |
| <b>Aveiro</b>                         | <b>Shopping mall loading site, FORUM Aveiro (P3)</b>        | Area allocated to loading and unloading of vans and trucks, small roundabout. In addition: waste sorting area, deposit area for textile products. | 14                                     | 20.9 ± 9.7 | 389.8                                      | 533.5 ± 203.3 |
|                                       |                                                             |                                                                                                                                                   | 27.7                                   |            | 677.2                                      |               |

**Table S2.** Element oxide mass concentration for major and minor elements in the sampling sites.

| Element oxides                         |       | P1 (Campus UA) |       |       |       |       | P2 <sub>AVG</sub> (Indoor multistorey) |       |       |        |       | P3 (Underground) |       |       |       |  |
|----------------------------------------|-------|----------------|-------|-------|-------|-------|----------------------------------------|-------|-------|--------|-------|------------------|-------|-------|-------|--|
| Major element                          |       |                |       |       |       |       |                                        |       |       |        |       |                  |       |       |       |  |
| oxides                                 | Avg   | ±              | stdev | Min   | Max   | Avg   | ±                                      | stdev | Min   | Max    | Avg   | ±                | stdev | Min   | Max   |  |
| (mg g <sup>-1</sup> PM <sub>10</sub> ) |       |                |       |       |       |       |                                        |       |       |        |       |                  |       |       |       |  |
| Si                                     | 43.6  | ±              | 15.8  | 27.1  | 58.7  | 99.4  | ±                                      | 17.1  | 81.6  | 120.3  | 78.6  | ±                | 23.7  | 61.9  | 95.3  |  |
| Al                                     | 14.5  | ±              | 5.3   | 9.0   | 19.6  | 33.1  | ±                                      | 5.7   | 27.2  | 40.1   | 26.2  | ±                | 7.9   | 20.6  | 31.8  |  |
| Ca                                     | 190.7 | ±              | 34.6  | 159.0 | 227.6 | 104.7 | ±                                      | 42.9  | 58.7  | 154.6  | 84.0  | ±                | 17.6  | 71.6  | 96.5  |  |
| Fe                                     | 12.0  | ±              | 6.5   | 5.5   | 18.4  | 24.6  | ±                                      | 11.2  | 9.1   | 36.5   | 18.9  | ±                | 3.8   | 16.2  | 21.6  |  |
| K                                      | 1.7   | ±              | 0.8   | 0.7   | 2.4   | 5.8   | ±                                      | 1.6   | 3.6   | 7.6    | 4.4   | ±                | 1.9   | 3.0   | 5.7   |  |
| Mg                                     | 2.4   | ±              | 0.1   | 2.3   | 2.4   | 5.5   | ±                                      | 1.1   | 4.5   | 7.1    | 3.7   | ±                | 1.1   | 2.9   | 4.4   |  |
| Mn                                     | 0.2   | ±              | 0.1   | 0.1   | 0.2   | 0.3   | ±                                      | 0.2   | 0.1   | 0.5    | 0.2   | ±                | 0.1   | 0.2   | 0.3   |  |
| P                                      | 0.7   | ±              | 0.1   | 0.7   | 0.8   | 1.8   | ±                                      | 1.1   | 0.7   | 3.6    | 2.2   | ±                | 0.6   | 1.8   | 2.6   |  |
| S                                      | 2.6   | ±              | 0.5   | 2.2   | 3.2   | 8.3   | ±                                      | 2.6   | 4.8   | 11.9   | 10.8  | ±                | 3.1   | 8.6   | 13.0  |  |
| Ti                                     | 0.6   | ±              | 0.1   | 0.5   | 0.7   | 2.1   | ±                                      | 0.5   | 1.2   | 2.6    | 1.8   | ±                | 0.4   | 1.5   | 2.1   |  |
| Minor element                          |       |                |       |       |       |       |                                        |       |       |        |       |                  |       |       |       |  |
| oxides                                 | Avg   | ±              | stdev | Min   | Max   | Avg   | ±                                      | stdev | Min   | Max    | Avg   | ±                | stdev | Min   | Max   |  |
| (µg g <sup>-1</sup> PM <sub>10</sub> ) |       |                |       |       |       |       |                                        |       |       |        |       |                  |       |       |       |  |
| Li                                     | 21.0  | ±              | 6.9   | 13.1  | 25.1  | 77.8  | ±                                      | 22.8  | 43.7  | 102.3  | 53.5  | ±                | 11.0  | 45.6  | 61.3  |  |
| Be                                     | 0.6   | ±              | 0.7   | 0.2   | 1.4   | 3.7   | ±                                      | 1.2   | 2.0   | 4.8    | 2.1   | ±                | 1.6   | 0.9   | 3.2   |  |
| Sc                                     | 2.2   | ±              | 0.7   | 1.5   | 2.9   | 3.9   | ±                                      | 1.2   | 2.7   | 5.5    | 2.9   | ±                | 0.7   | 2.4   | 3.4   |  |
| V                                      | 31.0  | ±              | 2.4   | 28.3  | 32.8  | 64.6  | ±                                      | 21.7  | 36.2  | 88.9   | 37.6  | ±                | 9.1   | 31.1  | 44.1  |  |
| Cr                                     | 147.2 | ±              | 102.0 | 56.9  | 257.9 | 241.8 | ±                                      | 136.8 | 72.8  | 381.7  | 129.8 | ±                | 15.1  | 119.1 | 140.5 |  |
| Co                                     | 2.4   | ±              | 0.5   | 1.8   | 2.8   | 6.1   | ±                                      | 2.5   | 2.7   | 8.9    | 5.6   | ±                | 1.3   | 4.7   | 6.5   |  |
| Ni                                     | 27.7  | ±              | 8.4   | 22.8  | 37.4  | 58.6  | ±                                      | 41.2  | 16.6  | 103.1  | 30.6  | ±                | 5.4   | 26.8  | 34.4  |  |
| Cu                                     | 251.5 | ±              | 165.9 | 99.6  | 428.5 | 604.1 | ±                                      | 337.4 | 165.9 | 1048.6 | 327.3 | ±                | 22.0  | 311.7 | 342.8 |  |

|    |       |   |       |       |        |        |   |       |        |        |        |   |       |        |        |
|----|-------|---|-------|-------|--------|--------|---|-------|--------|--------|--------|---|-------|--------|--------|
| Zn | 835.3 | ± | 806.0 | 332.4 | 1764.9 | 1974.7 | ± | 754.4 | 1032.3 | 3070.2 | 2232.6 | ± | 478.8 | 1894.0 | 2571.1 |
| Ga | 3.8   | ± | 1.0   | 2.8   | 4.8    | 9.7    | ± | 2.4   | 6.6    | 12.0   | 7.0    | ± | 2.0   | 5.6    | 8.4    |
| Ge | 0.7   | ± | 0.2   | 0.5   | 0.8    | 1.6    | ± | 0.2   | 1.3    | 1.9    | 1.1    | ± | 0.4   | 0.9    | 1.3    |
| As | 1.3   | ± | 1.1   | 0.2   | 2.4    | 6.7    | ± | 3.4   | 3.1    | 10.6   | 4.6    | ± | 2.5   | 2.8    | 6.4    |
| Se | 0.2   | ± | 0.2   | 0.1   | 0.4    | 0.9    | ± | 0.2   | 0.7    | 1.0    | 0.4    | ± | 0.2   | 0.2    | 0.5    |
| Rb | 22.7  | ± | 7.8   | 14.1  | 29.4   | 70.0   | ± | 17.0  | 45.7   | 87.1   | 45.1   | ± | 12.8  | 36.1   | 54.1   |
| Sr | 99.9  | ± | 7.9   | 94.0  | 108.8  | 200.2  | ± | 72.4  | 132.7  | 290.9  | 108.8  | ± | 27.6  | 89.3   | 128.3  |
| Y  | 5.7   | ± | 0.5   | 5.2   | 6.3    | 6.7    | ± | 2.3   | 4.0    | 9.7    | 7.3    | ± | 2.5   | 5.6    | 9.1    |
| Zr | 63.5  | ± | 43.1  | 22.3  | 108.2  | 112.6  | ± | 51.2  | 61.6   | 184.6  | 46.9   | ± | 2.5   | 45.1   | 48.6   |
| Nb | 1.1   | ± | 0.6   | 0.4   | 1.5    | 4.8    | ± | 3.1   | 1.2    | 8.3    | 3.3    | ± | 1.5   | 2.2    | 4.4    |
| Mo | 8.8   | ± | 7.4   | 2.2   | 16.7   | 24.6   | ± | 13.8  | 7.6    | 42.3   | 7.9    | ± | 1.5   | 6.9    | 9.0    |
| Cd | 0.3   | ± | 0.0   | 0.2   | 0.3    | 0.4    | ± | 0.2   | 0.2    | 0.6    | 0.5    | ± | 0.2   | 0.4    | 0.6    |
| Sn | 33.4  | ± | 27.9  | 13.7  | 65.4   | 102.9  | ± | 67.3  | 43.3   | 206.4  | 12.7   | ± | 11.0  | 4.9    | 20.5   |
| Sb | 5.8   | ± | 4.4   | 1.7   | 10.4   | 22.8   | ± | 11.4  | 8.8    | 32.2   | 13.4   | ± | 1.3   | 12.4   | 14.4   |
| Cs | 1.5   | ± | 0.5   | 1.0   | 1.9    | 5.4    | ± | 1.5   | 3.6    | 7.6    | 3.4    | ± | 1.0   | 2.6    | 4.1    |
| Ba | 733.6 | ± | 550.0 | 235.5 | 1323.9 | 1749.4 | ± | 514.4 | 1059.1 | 2348.1 | 1569.8 | ± | 356.8 | 1317.5 | 1822.0 |
| La | 6.8   | ± | 0.5   | 6.4   | 7.3    | 12.7   | ± | 2.2   | 10.4   | 15.6   | 9.3    | ± | 2.9   | 7.2    | 11.4   |
| Ce | 11.5  | ± | 2.2   | 9.2   | 13.5   | 25.1   | ± | 5.1   | 20.4   | 32.9   | 17.3   | ± | 5.5   | 13.4   | 21.2   |
| Pr | 1.3   | ± | 0.3   | 1.0   | 1.6    | 2.5    | ± | 0.4   | 2.0    | 3.1    | 1.8    | ± | 0.6   | 1.4    | 2.2    |
| Nd | 5.3   | ± | 1.0   | 4.2   | 6.3    | 10.4   | ± | 1.5   | 8.6    | 12.3   | 8.0    | ± | 2.5   | 6.2    | 9.7    |
| Sm | 1.0   | ± | 0.2   | 0.8   | 1.2    | 1.8    | ± | 0.3   | 1.5    | 2.1    | 1.3    | ± | 0.5   | 1.0    | 1.7    |
| Eu | 0.2   | ± | 0.0   | 0.1   | 0.2    | 0.4    | ± | 0.1   | 0.2    | 0.5    | 0.4    | ± | 0.1   | 0.3    | 0.5    |
| Gd | 1.0   | ± | 0.2   | 0.8   | 1.2    | 1.9    | ± | 0.4   | 1.6    | 2.4    | 1.4    | ± | 0.4   | 1.1    | 1.7    |
| Tb | 0.1   | ± | 0.0   | 0.1   | 0.1    | 0.2    | ± | 0.1   | 0.1    | 0.3    | 0.2    | ± | 0.1   | 0.2    | 0.3    |
| Dy | 0.7   | ± | 0.1   | 0.6   | 0.8    | 1.1    | ± | 0.3   | 0.9    | 1.5    | 0.9    | ± | 0.3   | 0.7    | 1.1    |
| Ho | 0.1   | ± | 0.0   | 0.1   | 0.2    | 0.2    | ± | 0.1   | 0.1    | 0.3    | 0.2    | ± | 0.1   | 0.1    | 0.2    |
| Er | 0.4   | ± | 0.1   | 0.3   | 0.5    | 0.6    | ± | 0.1   | 0.4    | 0.8    | 0.5    | ± | 0.2   | 0.3    | 0.6    |

|    |      |   |     |      |      |       |   |      |      |       |      |   |      |      |       |
|----|------|---|-----|------|------|-------|---|------|------|-------|------|---|------|------|-------|
| Tm | 0.0  | ± | 0.0 | 0.0  | 0.1  | 0.1   | ± | 0.0  | 0.1  | 0.1   | 0.1  | ± | 0.0  | 0.0  | 0.1   |
| Yb | 0.3  | ± | 0.1 | 0.3  | 0.4  | 0.5   | ± | 0.2  | 0.4  | 0.7   | 0.4  | ± | 0.1  | 0.3  | 0.5   |
| Lu | 0.0  | ± | 0.0 | 0.0  | 0.1  | 0.1   | ± | 0.0  | 0.1  | 0.1   | 0.1  | ± | 0.0  | 0.0  | 0.1   |
| Hf | 1.4  | ± | 1.0 | 0.4  | 2.4  | 2.5   | ± | 1.0  | 1.7  | 3.9   | 1.1  | ± | 0.0  | 1.1  | 1.1   |
| Ta | nd   |   | nd  | 0.0  | 0.0  | 0.4   | ± | 0.3  | 0.1  | 0.6   | 0.1  | ± | 0.0  | 0.1  | 0.1   |
| W  | nd   |   | nd  | 0.0  | 0.0  | 5.5   | ± | 0.0  | 5.5  | 5.5   | nd   |   | nd   | 0.0  | 0.0   |
| Tl | nd   |   | nd  | 0.0  | 0.0  | 0.3   | ± | 0.2  | 0.0  | 0.5   | 0.2  | ± | 0.0  | 0.2  | 0.2   |
| Pb | 22.7 | ± | 7.8 | 14.3 | 29.7 | 129.7 | ± | 37.1 | 75.3 | 174.4 | 89.4 | ± | 21.1 | 74.5 | 104.3 |
| Bi | 2.7  | ± | 2.5 | 0.6  | 5.5  | 45.0  | ± | 14.5 | 31.0 | 67.6  | 3.7  | ± | 0.3  | 3.5  | 3.9   |
| Th | 2.2  | ± | 0.8 | 1.3  | 2.9  | 3.6   | ± | 0.8  | 2.4  | 4.4   | 2.7  | ± | 0.8  | 2.2  | 3.3   |
| U  | 1.6  | ± | 0.6 | 1.2  | 2.3  | 2.6   | ± | 0.9  | 1.6  | 3.8   | 2.0  | ± | 0.6  | 1.5  | 2.4   |

nd – not determined

**Table S3.** The geoaccumulation index ( $I_{geo}$ ) and the values obtained in the three parking areas.

|         |     |                                           |
|---------|-----|-------------------------------------------|
| Class 0 | <0  | Uncontaminated                            |
| Class 1 | 0-1 | Uncontaminated to moderately contaminated |
| Class 2 | 1-2 | Moderately contaminated                   |
| Class 3 | 2-3 | Moderately to heavily contaminated        |
| Class 4 | 3-4 | Heavily contaminated                      |
| Class 5 | 4-5 | Heavily to Extremely contaminated         |
| Class 6 | >5  | Extremely contaminated                    |

| Geoaccumulation index ( $I_{geo}$ ) |      |                   |      |
|-------------------------------------|------|-------------------|------|
| Major elements                      | P1   | P2 <sub>AVG</sub> | P3   |
| Al                                  | -3.0 | -1.8              | -2.1 |
| Ca                                  | 2.1  | 1.2               | 0.9  |
| Fe                                  | -2.0 | -0.9              | -1.3 |
| K                                   | -4.7 | -2.9              | -3.3 |
| Mg                                  | -3.1 | -1.9              | -2.5 |
| Mn                                  | -2.4 | -1.3              | -1.8 |
| P                                   | -0.5 | 0.8               | 1.1  |
| S                                   | 0.9  | 2.5               | 2.9  |
| Ti                                  | -3.0 | -1.1              | -1.3 |
| Minor elements                      | P1   | P2 <sub>AVG</sub> | P3   |
| Li                                  | -0.6 | 1.2               | 0.7  |
| Be                                  | -3.0 | -0.3              | -1.2 |
| Sc                                  | -2.3 | -1.4              | -1.9 |
| V                                   | -1.4 | -0.3              | -1.1 |
| Cr                                  | 1.5  | 2.2               | 1.3  |
| Co                                  | -2.9 | -1.5              | -1.6 |
| Ni                                  | 0.0  | 1.1               | 0.1  |
| Cu                                  | 3.6  | 4.8               | 3.9  |
| Zn                                  | 3.4  | 4.7               | 4.8  |
| Ga                                  | -2.5 | -1.1              | -1.6 |
| Ge                                  | -1.6 | -0.3              | -0.9 |
| As                                  | -1.2 | 1.2               | 0.6  |
| Se                                  | 0.9  | 2.8               | 1.6  |
| Rb                                  | -2.9 | -1.2              | -1.9 |
| Sr                                  | -2.2 | -1.2              | -2.1 |
| Y                                   | -2.4 | -2.2              | -2.1 |
| Zr                                  | -2.5 | -1.7              | -2.9 |
| Nb                                  | -5.1 | -3.0              | -3.6 |
| Mo                                  | 2.1  | 3.6               | 1.9  |
| Cd                                  | 0.8  | 1.5               | 1.6  |
| Sn                                  | 3.2  | 4.8               | 1.8  |

|    |      |      |      |
|----|------|------|------|
| Sb | 3.6  | 5.6  | 4.8  |
| Cs | -2.5 | -0.7 | -1.4 |
| Ba | -0.4 | 0.8  | 0.6  |
| La | -2.8 | -1.9 | -2.4 |
| Ce | -3.1 | -2.0 | -2.5 |
| Pr | -2.8 | -1.9 | -2.4 |
| Nd | -2.9 | -2.0 | -2.3 |
| Sm | -2.8 | -2.0 | -2.4 |
| Eu | -3.4 | -2.5 | -2.2 |
| Gd | -2.0 | -1.2 | -1.6 |
| Tb | -2.7 | -1.9 | -1.7 |
| Dy | -2.7 | -2.0 | -2.3 |
| Ho | -2.9 | -2.3 | -2.6 |
| Er | -3.0 | -2.4 | -2.8 |
| Tm | -3.4 | -2.5 | -3.1 |
| Yb | -2.7 | -2.1 | -2.4 |
| Lu | -3.3 | -2.4 | -3.0 |
| Hf | -2.6 | -1.8 | -3.0 |
| Ta | nd   | -2.7 | -5.3 |
| W  | nd   | 1.4  | nd   |
| Tl | nd   | -2.1 | -2.6 |
| Pb | -0.2 | 2.3  | 1.8  |
| Bi | 3.9  | 7.9  | 4.3  |
| Th | -2.8 | -2.1 | -2.5 |
| U  | -1.2 | -0.5 | -0.9 |

nd =not determined.



**Table S4.** PAHs content.

| PAH mass concentration ( $\mu\text{g g}^{-1} \text{PM}_{10}$ ) | Avg P1 | P2 <sub>AVG</sub> | P2 <sub>BC</sub> | P2 <sub>AC</sub> | Avg P3 |
|----------------------------------------------------------------|--------|-------------------|------------------|------------------|--------|
| Naphthalene                                                    | 6.94   | 2.52              | 0.51             | 14.60            | 4.44   |
| 2-Methylnaphthalene                                            | <dl    | 0.02              | 0.02             | <dl              | <dl    |
| 1-Methylnaphthalene                                            | <dl    | 0.02              | 0.02             | <dl              | 0.04   |
| Acenaphthylene                                                 | <dl    | 0.06              | 0.07             | <dl              | 0.09   |
| Acenaphthene                                                   | <dl    | 0.09              | 0.10             | <dl              | 0.09   |
| Fluorene                                                       | 0.96   | 0.80              | 0.88             | 0.36             | 0.40   |
| Phenanthrene                                                   | 7.13   | 3.61              | 2.27             | 11.68            | 10.32  |
| Anthracene                                                     | 1.35   | 0.52              | 0.24             | 2.19             | 0.63   |
| Fluoranthene                                                   | 1.35   | 0.78              | 0.84             | 0.36             | 1.35   |
| Pyrene                                                         | 0.58   | 1.50              | 1.56             | 1.09             | 1.71   |
| Benzanthracene                                                 | 0.00   | 0.49              | 0.26             | 1.82             | 0.45   |
| Chrysene                                                       | 0.58   | 0.38              | 0.32             | 0.73             | 0.58   |
| Benzo(b)fluoranthene                                           | 0.96   | 0.53              | 0.38             | 1.46             | 0.54   |
| Benzo(k)fluoranthene                                           | 0.58   | 0.29              | 0.21             | 0.73             | 0.31   |
| Benzo(e)pyrene                                                 | 0.77   | 0.33              | 0.26             | 0.73             | 0.45   |
| Benzo(a)pyrene                                                 | 0.77   | 0.22              | 0.26             | <dl              | 0.36   |
| Dibenzo(a,h)anthracene                                         | 0.58   | 0.21              | 0.19             | 0.36             | 0.36   |
| Indeno(1,2,3-cd)pyrene                                         | 0.19   | 0.05              | 0.06             | <dl              | 0.13   |
| Benzo(g,h,i)perylene                                           | 0.58   | 0.60              | 0.58             | 0.73             | 0.94   |
| Total naphthalene                                              | 6.94   | 2.56              | 0.55             | 14.60            | 4.49   |
| Total PAHs without naphthalene                                 | 17.35  | 9.89              | 7.83             | 22.26            | 0.76   |
| Total PAHs                                                     | 24.28  | 12.45             | 8.38             | 36.86            | 23.20  |

**dl – detection limit**

**Table S5.** Results for the bioluminescence bioassay with *Aliivibrio fischeri* bacteria, including EC<sub>50</sub> (% and mass concentration) and toxic units (TU).

| Sampling location |                   | Sample | Area<br>(cm <sup>2</sup> ) | PM in<br>extracted<br>area (µg) | Extraction<br>volume (ml) | PM in liq-<br>uid extract<br>(µg ml <sup>-1</sup> ) | EC <sub>50</sub><br>(%) | EC <sub>50</sub><br>(µg ml <sup>-1</sup> ) | EC <sub>20</sub><br>(%) | EC <sub>20</sub><br>(µg ml <sup>-1</sup> ) | TU    | Toxicity |       |
|-------------------|-------------------|--------|----------------------------|---------------------------------|---------------------------|-----------------------------------------------------|-------------------------|--------------------------------------------|-------------------------|--------------------------------------------|-------|----------|-------|
| Parking<br>areas  | Campus<br>UA (P1) | AEQ_26 | 1.57                       | 476                             | 2                         | 238.07                                              | 65.78                   | 157                                        | 13.40                   | 32                                         | 1.52  | TOXIC    |       |
|                   |                   | AEQ_27 | 5.86                       | 4088                            | 4                         | 1022.04                                             | 33.62                   | 344                                        | 13.59                   | 139                                        | 2.97  | TOXIC    |       |
|                   |                   | AEQ_29 | 5.86                       | 1931                            | 4                         | 482.76                                              | 94.81                   | 458                                        | 15.42                   | 74                                         | 1.05  | TOXIC    |       |
|                   |                   | AEQ_18 | 5.56                       | 9355                            | 4                         | 2338.76                                             | 19.57                   | 458                                        | 4.17                    | 98                                         | 5.11  | TOXIC    |       |
|                   |                   | Parque | AEQ_19                     | 7.52                            | 20374                     | 4                                                   | 5093.48                 | 17.51                                      | 892                     | 2.11                                       | 107   | 5.71     | TOXIC |
|                   |                   | Ana    | AEQ_20                     | 5.95                            | 6720                      | 4                                                   | 1680.04                 | 26.36                                      | 443                     | 4.37                                       | 73    | 3.79     | TOXIC |
|                   |                   | Vieira | AEQ_21                     | 5.56                            | 4101                      | 4                                                   | 1025.23                 | 48.00                                      | 492                     | 8.41                                       | 86    | 2.08     | TOXIC |
|                   |                   | (P2)   | AEQ_22                     | 1.57                            | 2543                      | 2                                                   | 1271.70                 | 32.42                                      | 412                     | 5.50                                       | 70    | 3.08     | TOXIC |
|                   |                   |        | AEQ_30                     | 1.57                            | 264                       | 2                                                   | 132.23                  | 28.11                                      | 37                      | 12.95                                      | 17    | 3.56     | TOXIC |
|                   |                   |        |                            |                                 |                           |                                                     |                         |                                            |                         |                                            |       |          |       |
|                   | FORUM<br>UA (P3)  | AEQ_31 | 5.23                       | 3006                            | 4                         | 751.47                                              | 19.65                   | 148                                        | 3.59                    | 27                                         | 5.09  | TOXIC    |       |
|                   |                   | AEQ_32 | 5.95                       | 6342                            | 4                         | 1585.60                                             | 24.25                   | 385                                        | 5.10                    | 81                                         | 4.12  | TOXIC    |       |
| AEQ_33            |                   | 5.56   | 6300                       | 4                               | 1574.89                   | 18.39                                               | 290                     | 4.71                                       | 74                      | 5.44                                       | TOXIC |          |       |

|                 |               |
|-----------------|---------------|
| NON-TOXIC       | TU < 1        |
| TOXIC           | 1 < TU < 10   |
| VERY TOXIC      | 10 < TU < 100 |
| EXTREMELY TOXIC | TU > 100      |
